# Supplementary material
Source: PubMed Central journal article supplement (PMC5882545)
Supplement: NIHMS945368-supplement-1.pdf [file NIHMS945368-supplement-1.pdf]

**Supplemental Table S1:  
Melanoma Patient Characteristics for  
Unanalyzable Patient Cohort (n=42)**

**Clinical Characteristics**

Gender

|                 |           |
|-----------------|-----------|
| Male, no. (%)   | 33 (78.6) |
| Female, no. (%) | 9 (21.4)  |

Age

|                     |              |
|---------------------|--------------|
| Median, no. (range) | 74.5 (34-97) |
|---------------------|--------------|

Location of Tumor

|                    |           |
|--------------------|-----------|
| Trunk, no. (%)     | 14 (33.3) |
| Extremity, no. (%) | 28 (66.7) |
| Unknown, no (%)    | 0 (0)     |

Stage

|              |           |
|--------------|-----------|
| II, no. (%)  | 37 (88.1) |
| III, no. (%) | 5 (11.9)  |

**Pathological Characteristics**

Depth (mm)

|                     |                |
|---------------------|----------------|
| Median, no. (range) | 2.75 (0.32-26) |
|---------------------|----------------|

Ulceration

|                  |           |
|------------------|-----------|
| Absent, no. (%)  | 18 (42.8) |
| Present, no. (%) | 22 (52.4) |
| Unknown, no. (%) | 2 (4.8)   |

**Outcome Characteristics**

Patient Follow-Up (months)

|                     |              |
|---------------------|--------------|
| Median, no. (range) | 36.5 (3-171) |
|---------------------|--------------|

OS (months)

|                                   |           |
|-----------------------------------|-----------|
| Alive (at least 2 years), no. (%) | 12 (29.3) |
| Dead, no. (%)                     | 29 (70.7) |

DSS (months)

|                                |           |
|--------------------------------|-----------|
| Alive or NED at Death, no. (%) | 13 (30.9) |
| Dead with melanoma, no. (%)    | 6 (14.3)  |
| Unknown, no (%)                | 23 (54.8) |

(OS = Overall Survival, DSS = Disease Specific Survival, NED = No Evidence of Disease)

**Supplemental Table S1: Demographics for Unanalyzable Cohort.**

**Supplemental Table S2:  
Melanoma Patient Characteristics for DSS Cohort  
(n=64)**

**Clinical Characteristics**

Gender

|                 |           |
|-----------------|-----------|
| Male, no. (%)   | 50 (78.1) |
| Female, no. (%) | 14 (21.9) |

Age

|                     |            |
|---------------------|------------|
| Median, no. (range) | 68 (22-96) |
|---------------------|------------|

Location of Tumor

|                    |           |
|--------------------|-----------|
| Trunk, no. (%)     | 37 (57.8) |
| Extremity, no. (%) | 26 (40.6) |
| Unknown, no (%)    | 1 (1.6)   |

Stage

|              |           |
|--------------|-----------|
| II, no. (%)  | 51 (79.7) |
| III, no. (%) | 13 (20.3) |

**Pathological Characteristics**

Depth (mm)

|                     |                |
|---------------------|----------------|
| Median, no. (range) | 2.6 (0.7-11.4) |
|---------------------|----------------|

Ulceration

|                  |           |
|------------------|-----------|
| Absent, no. (%)  | 24 (37.5) |
| Present, no. (%) | 37 (57.8) |
| Unknown, no. (%) | 3 (4.7)   |

TILs

|                    |           |
|--------------------|-----------|
| Absent, no. (%)    | 1 (1.6)   |
| Non-Brisk, no. (%) | 41 (64.1) |
| Brisk, no. (%)     | 18 (28.1) |
| Unknown, no. (%)   | 4 (6.2)   |

**Outcome Characteristics**

Patient Follow-Up (months)

|                     |            |
|---------------------|------------|
| Median, no. (range) | 53 (5-173) |
|---------------------|------------|

OS (months)

|                                   |           |
|-----------------------------------|-----------|
| Alive (at least 2 years), no. (%) | 31 (48.4) |
| Dead, no. (%)                     | 33 (51.6) |

DSS (months)

|                                |           |
|--------------------------------|-----------|
| Alive or NED at death, no. (%) | 42 (65.6) |
| Dead with melanoma, no. (%)    | 22 (34.4) |
| Unknown, no (%)                | 0 (0)     |

(TILs = Tumor Infiltrating Lymphocytes, OS = Overall Survival, DSS = Disease Specific Survival, NED = No Evidence of Disease)

**Supplemental Table S2: Demographics for DSS Cohort.**

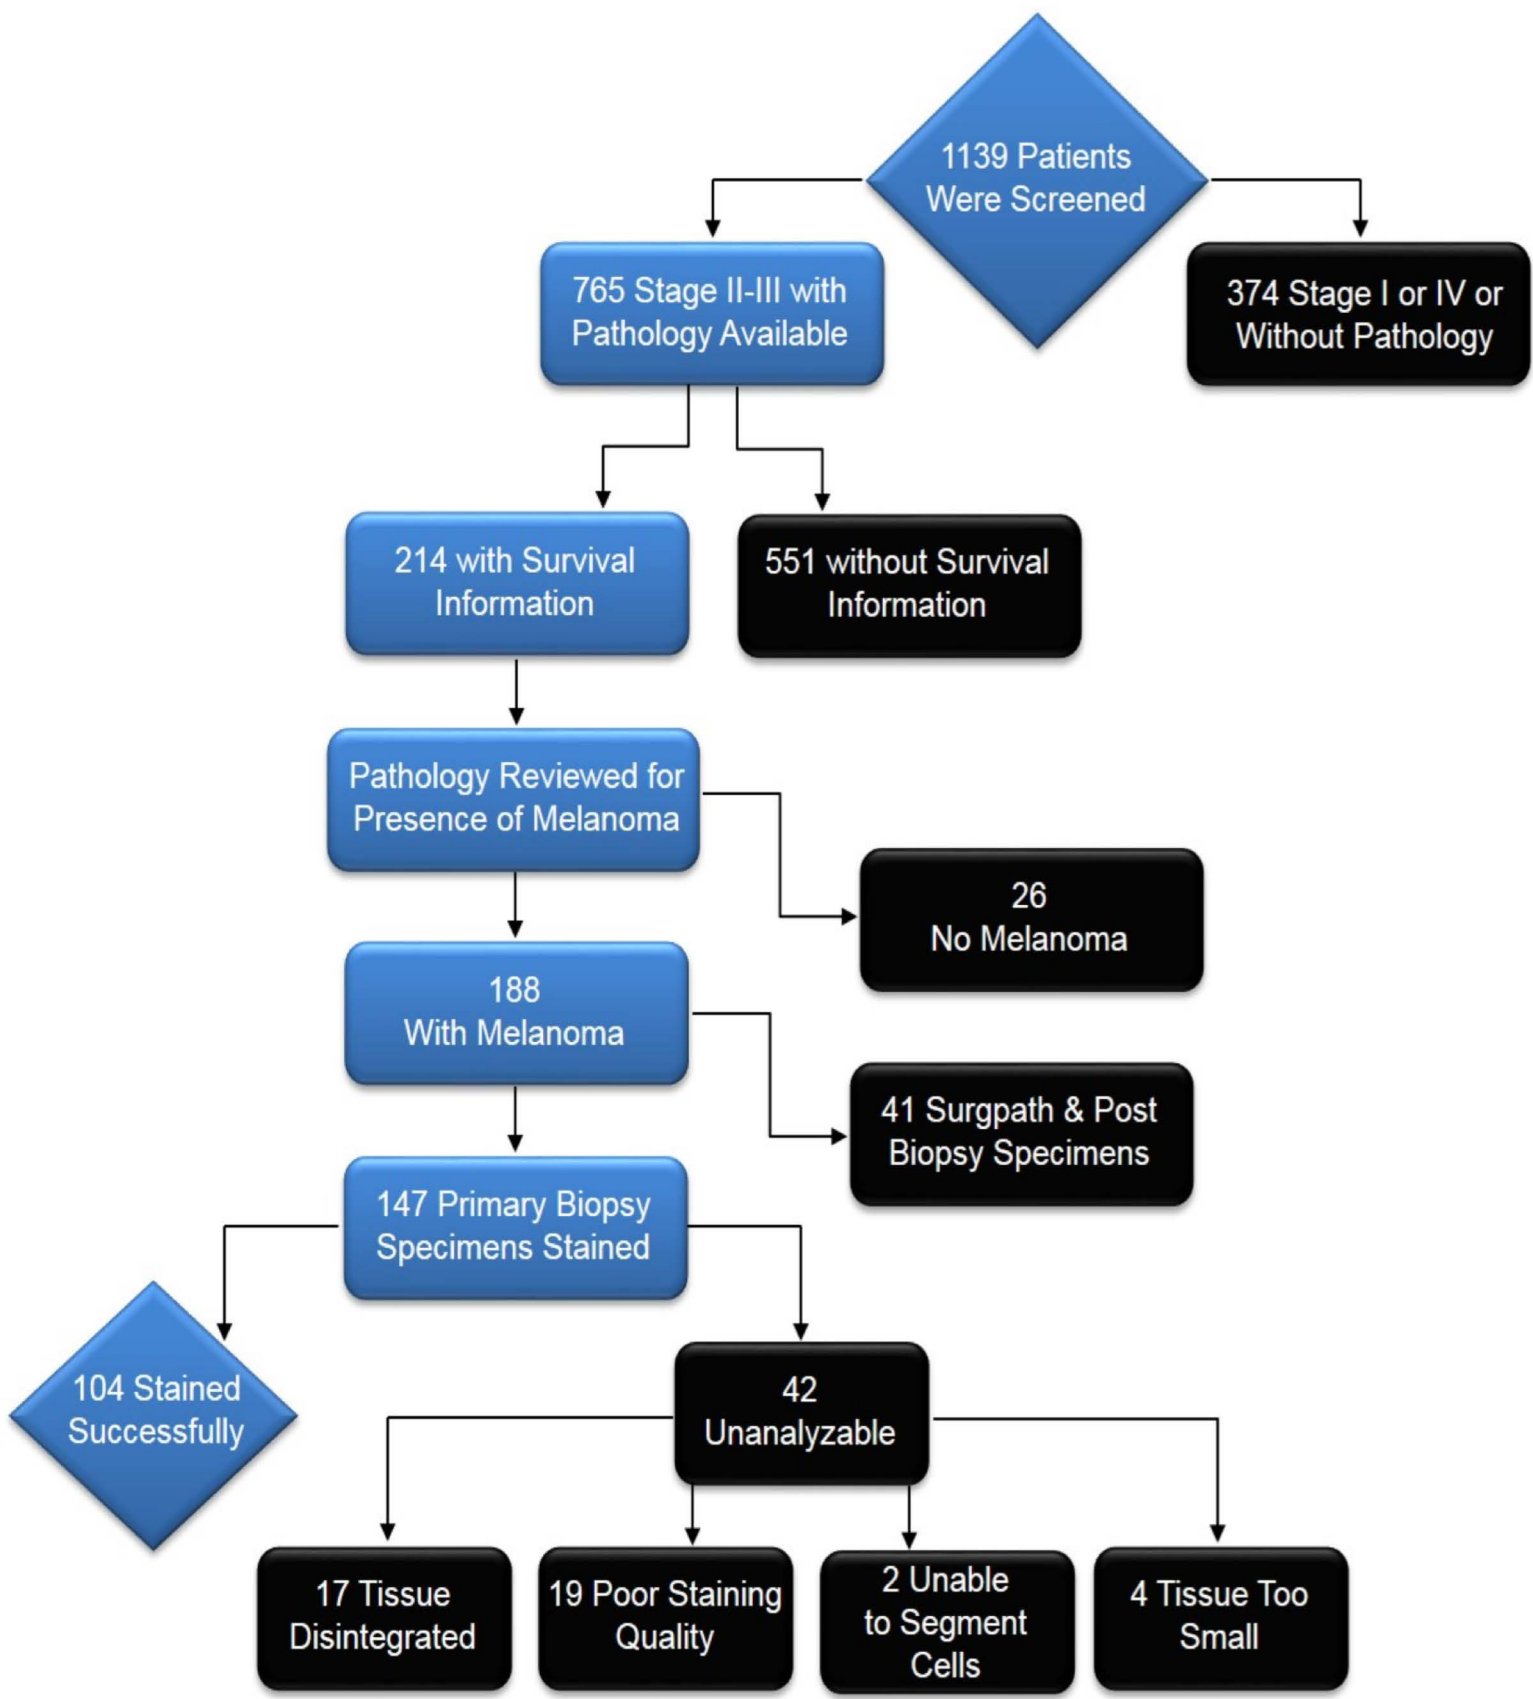

**Supplemental Figure S1:** Flow chart for database finding 147 patients with clinical follow up and known survival status. Of the 147 patients, we successfully stained and analyzed 104 samples. We were unable to analyze 42 patients (Table S2). Poor sample quality caused loss of tissue during the staining process in 17 patients and led to poor staining in 19 patients for which <6 markers stained successfully. 2 patients stained successfully but could not be analyzed during cell segmentation step due to nuclear hypersegmentation. 4 patients had small tissue which caused overlap of antibodies.

7 Color Multiplex

DAPI + SOX10

Tissue Segmentation

1

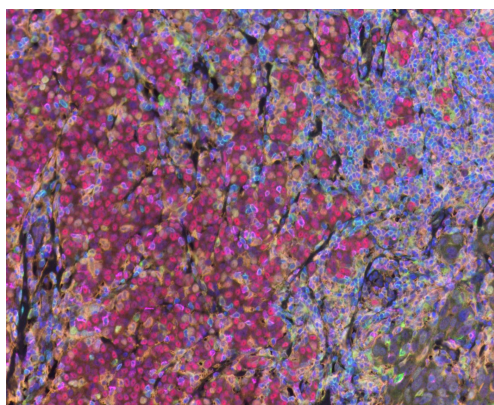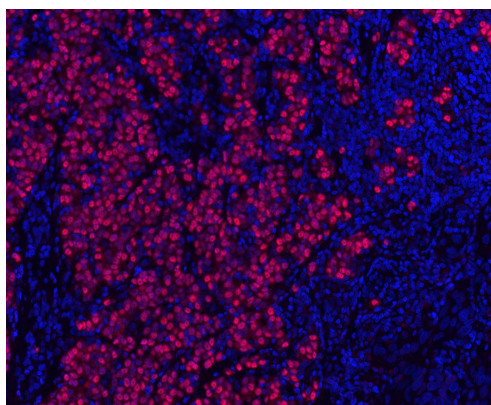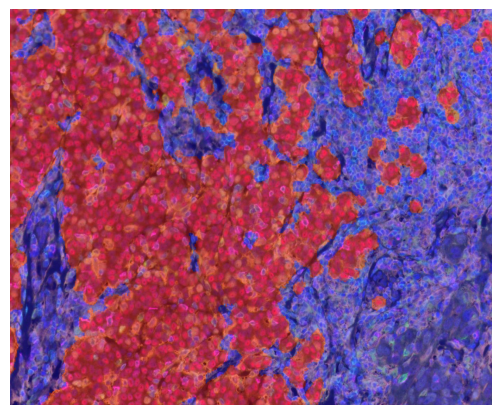

2

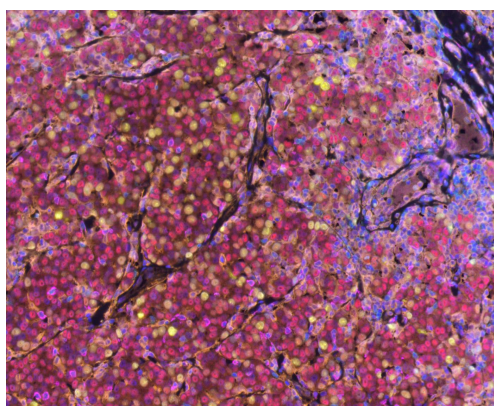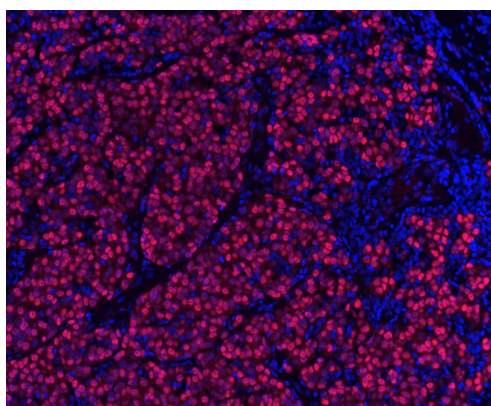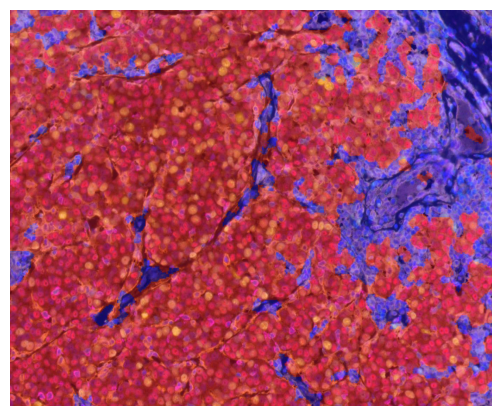

3

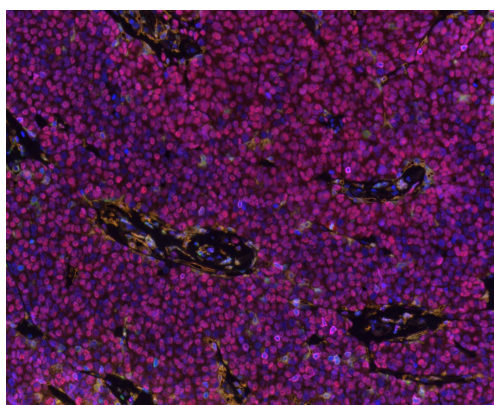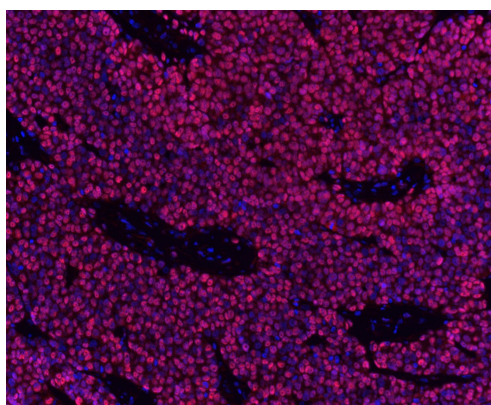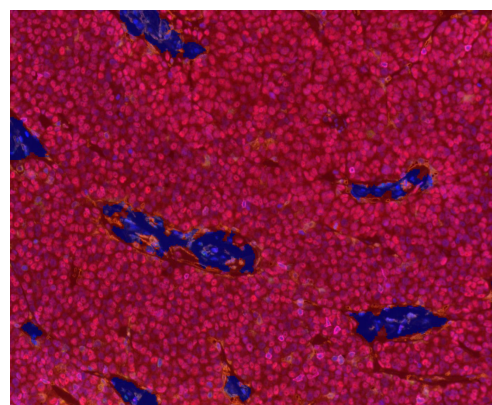

4

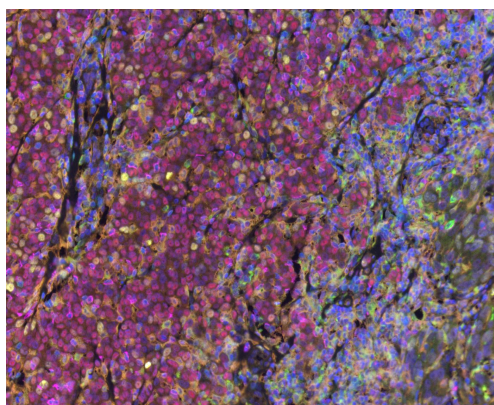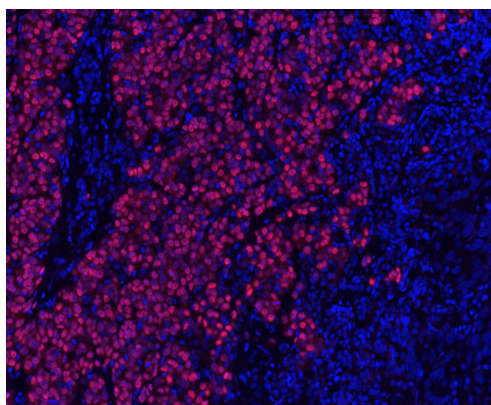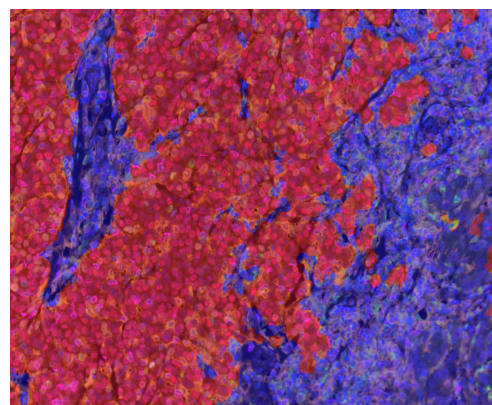

5

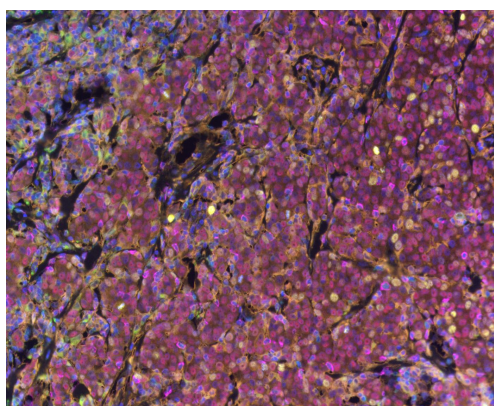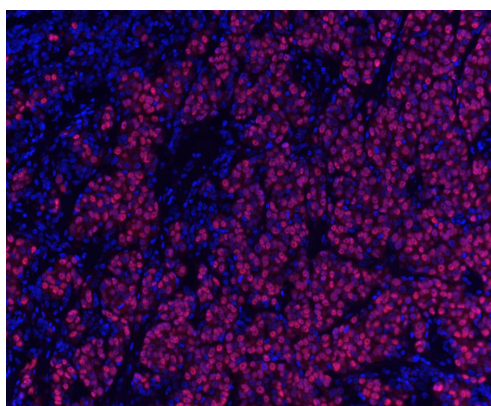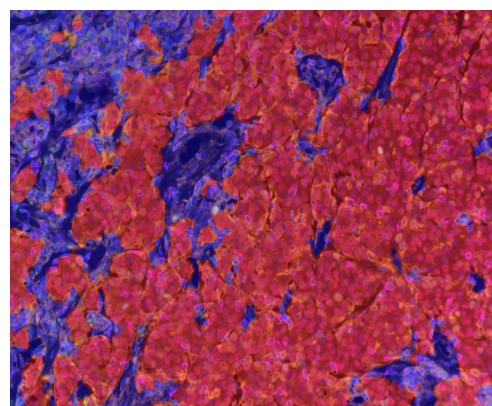

**Supplemental Figure S2:** Representation of Tissue segmentation for five images from same patient, marked 1 - 5. Tissue segmentation is performed by highlighting examples of tumor (SOX10 positive), and stroma or non-tumor tissue (SOX10 negative). For each image, we show: 7 color multiplex (left), DAPI + SOX10 only (middle) and with respective tissue segmentation (right). Images 1, 4 and 5 are tumor/stroma (up to 50% stroma) and images 2 and 3 are tumor only (at least 90% tumor).



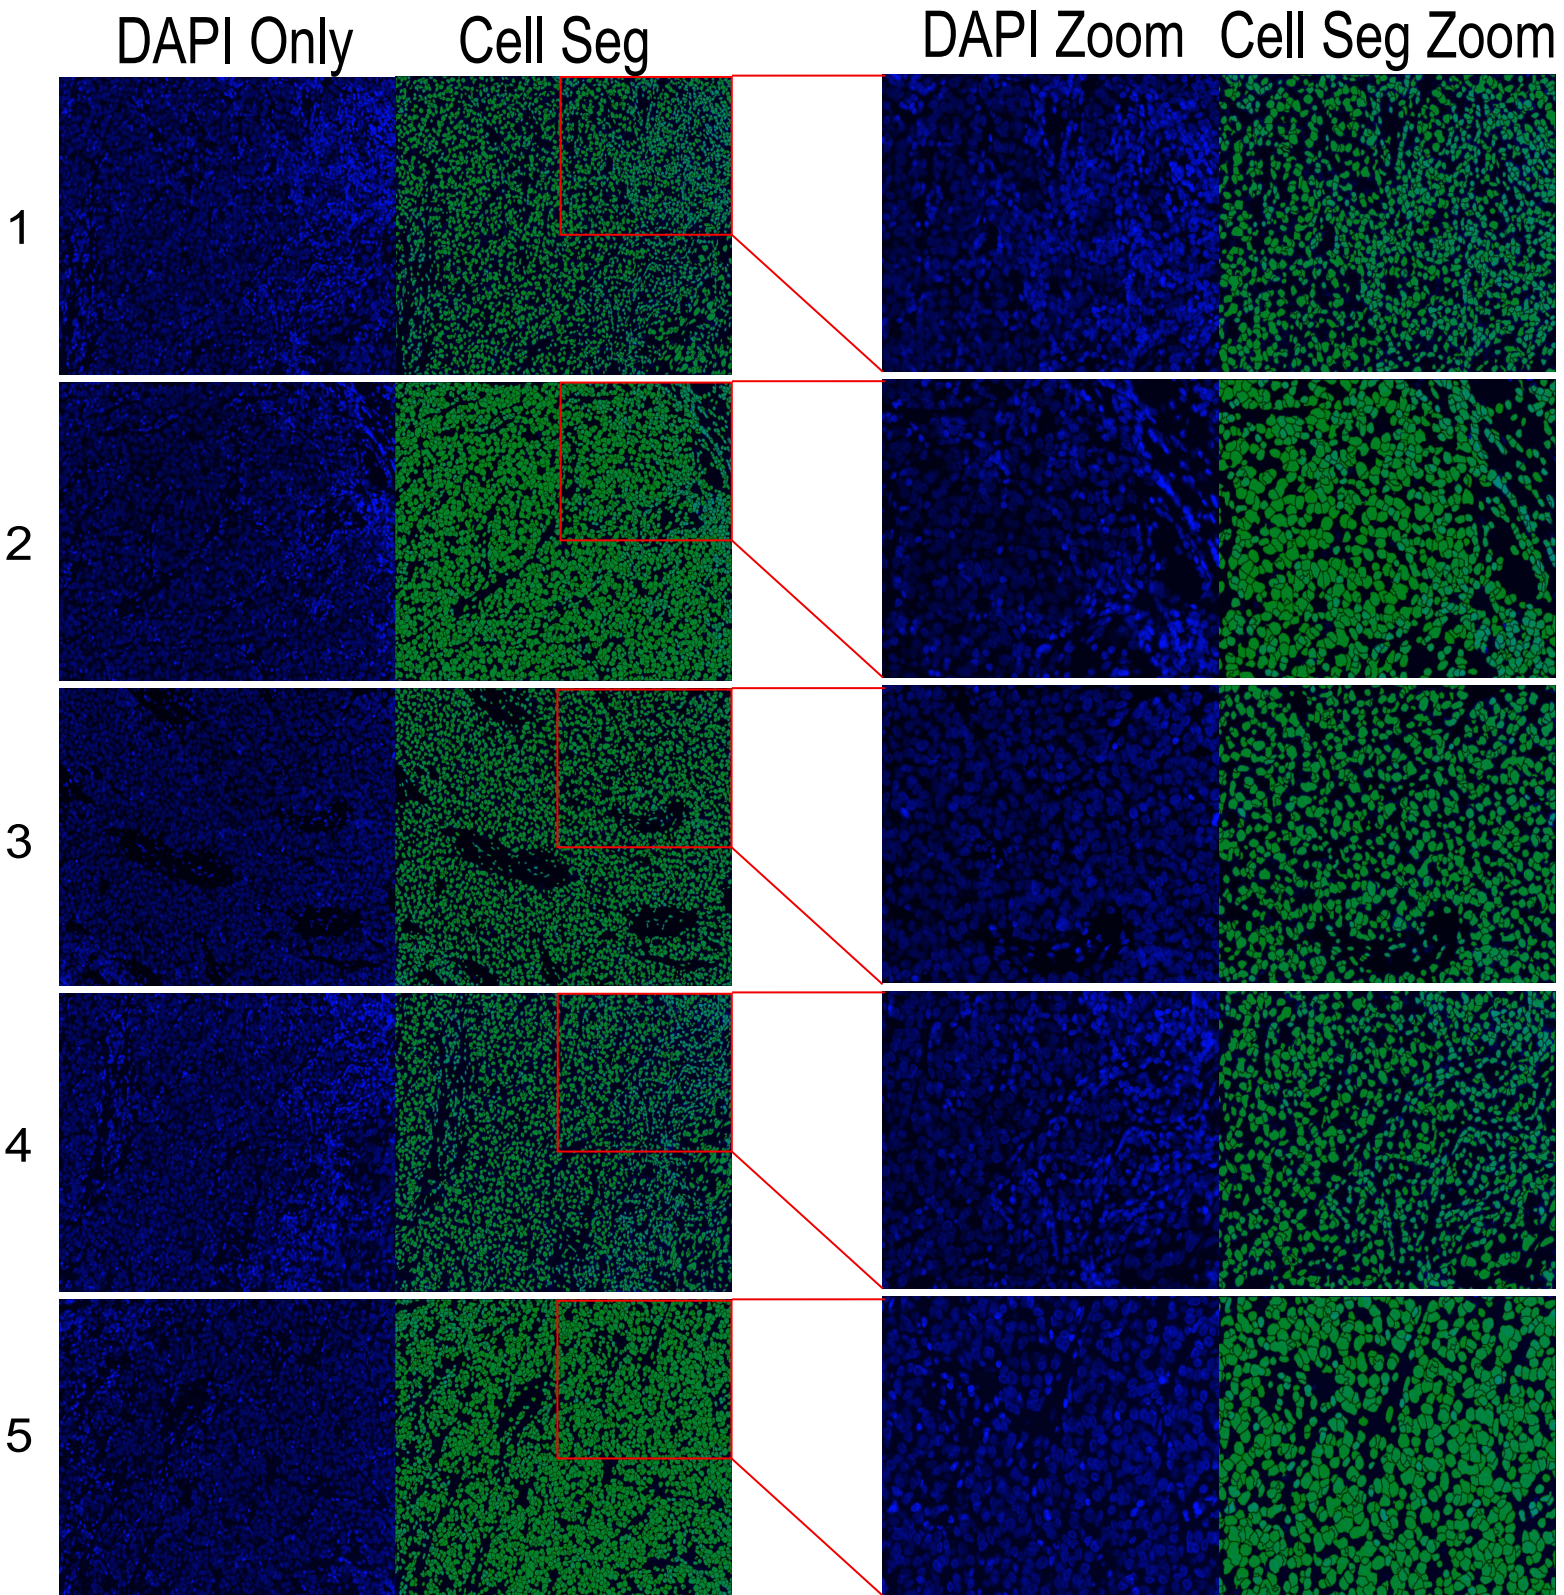

**Supplemental Figure S3:** Representation of Cell Segmentation for five images from same patient, marked 1 - 5. Cell Segmentation is trained using DAPI as a nuclear counterstain, defining each cell. Left: DAPI only + Cell Segmentation for each 20X image. Right: zoomed in area of the 20X image with DAPI and its respective cell segmentation as well.

### 7 Color Multiplex

### Base Phenotypes

### Phenotype Map

1

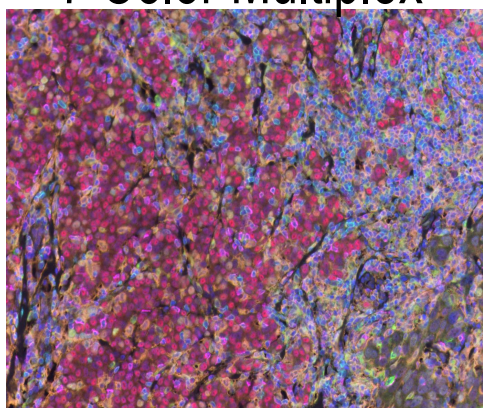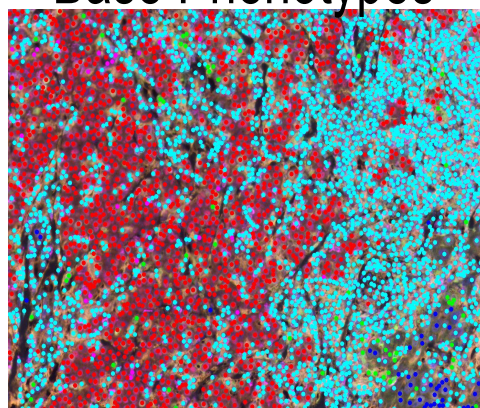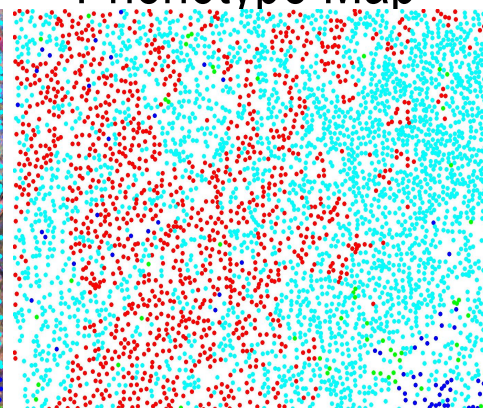

2

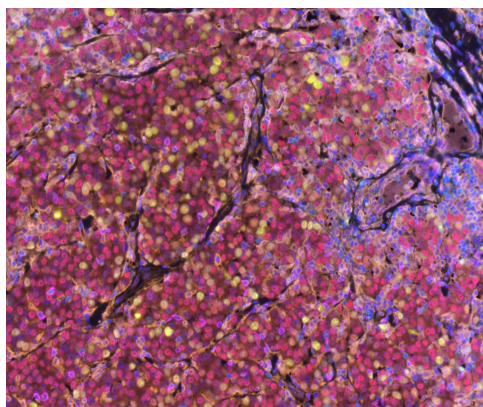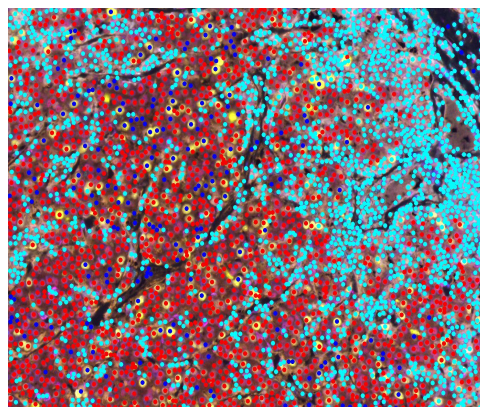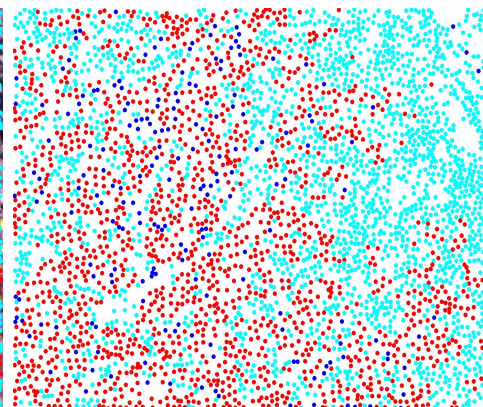

3

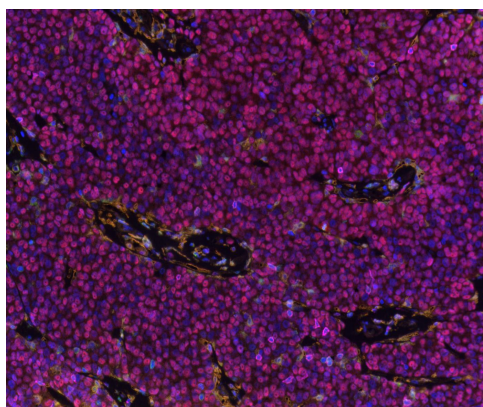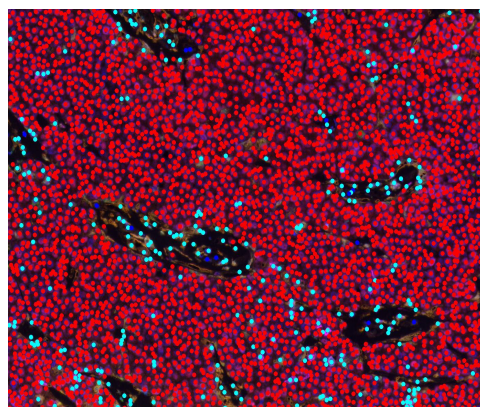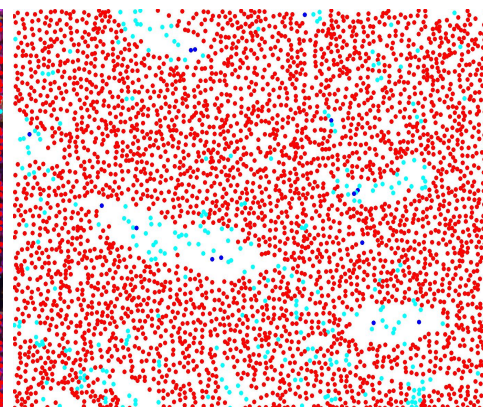

4

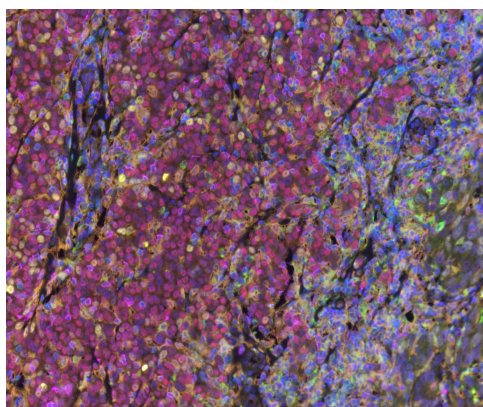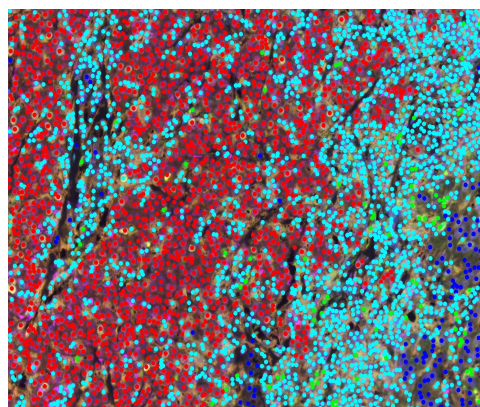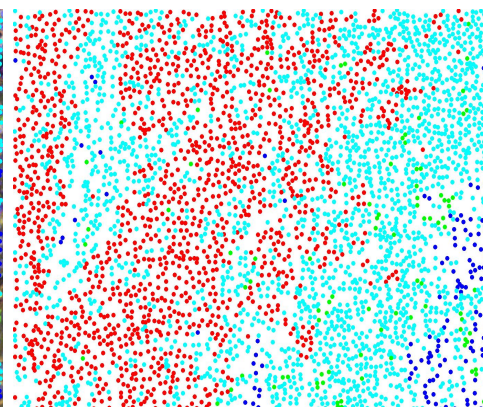

5

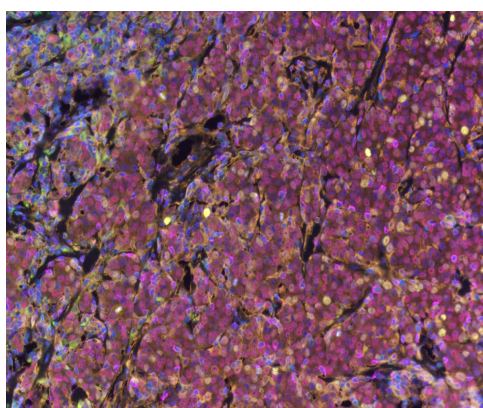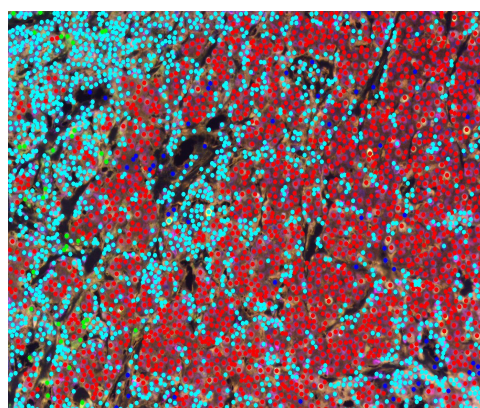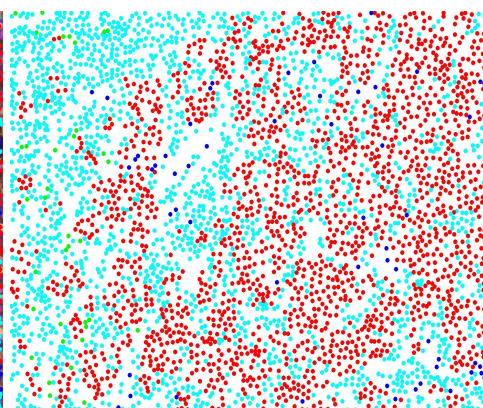

**Supplemental Figure S4:** Representation of Phenotyping. Phenotyping is trained using 10-15 examples of individual cell types using base variables – Tumor (SOX10+, red dots), CD3+ (cyan dots), CD68+ (green dots) and Other (blue). Left: 7 color multiplex, Middle: phenotyping over multiplex image, Right: phenotype map alone.

Supplemental Figure S5

DAPI + CD8

Tissue Segmentation

CD8 Score + (Tumor)

CD8 Score + (Stroma)

1

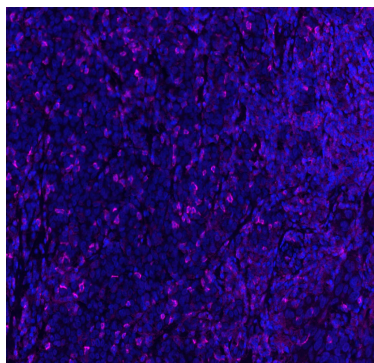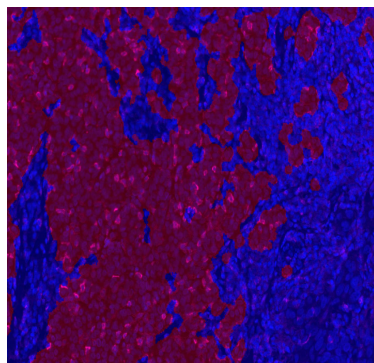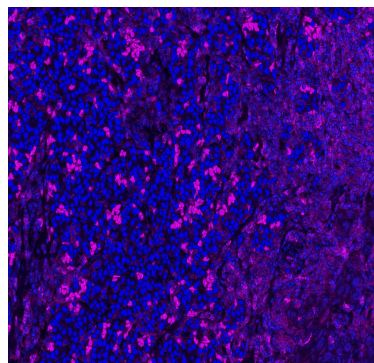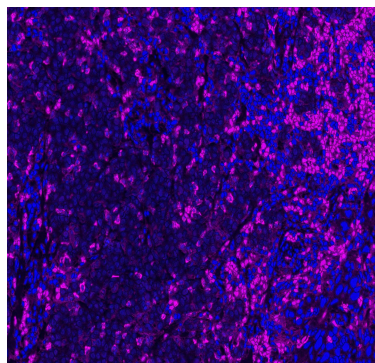

2

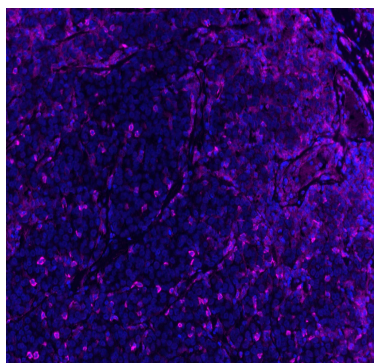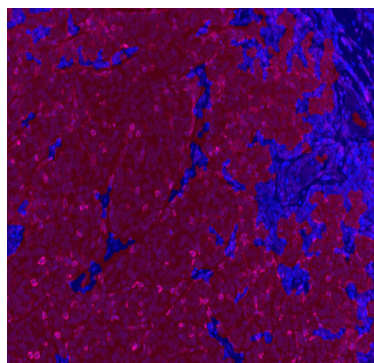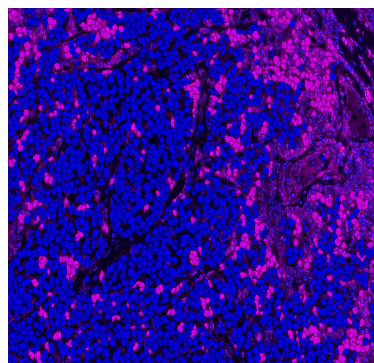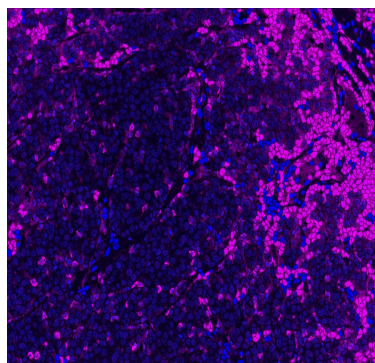

3

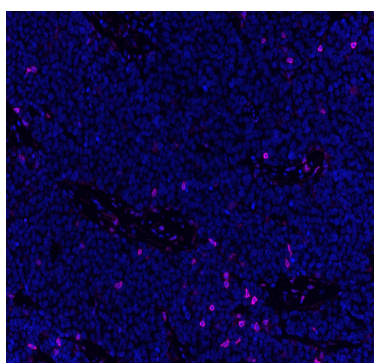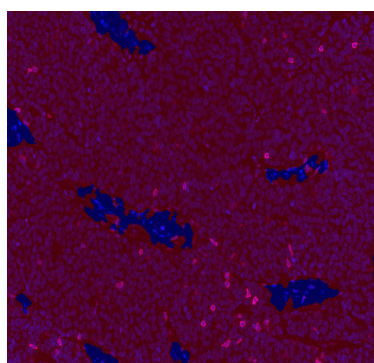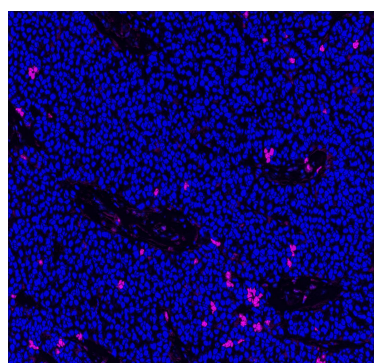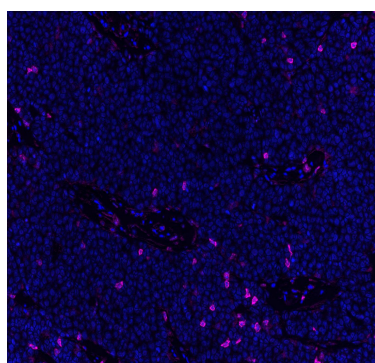

4

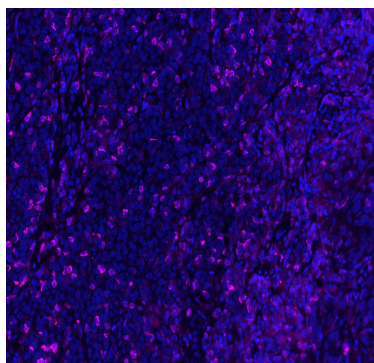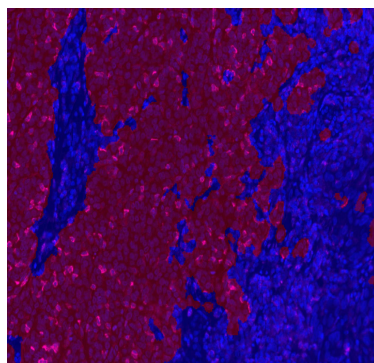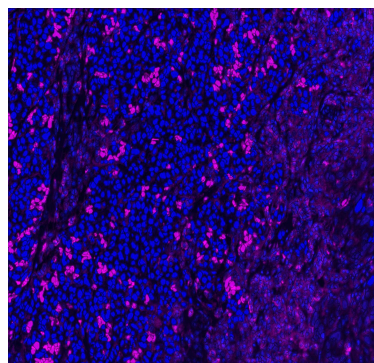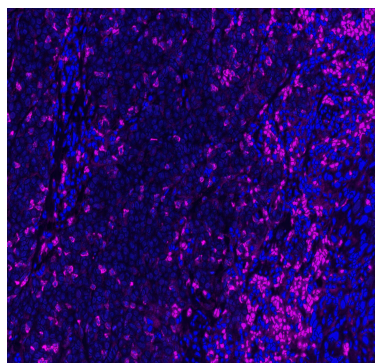

5

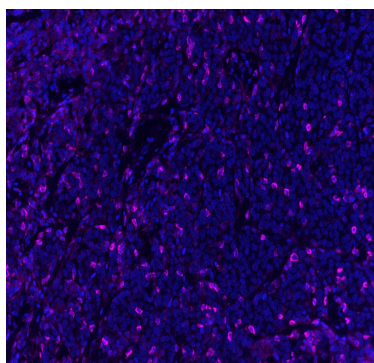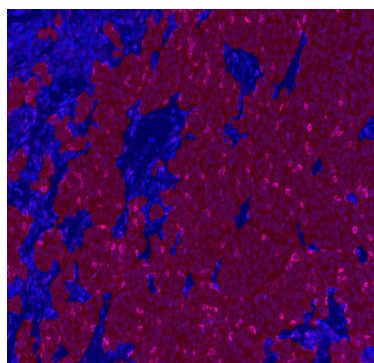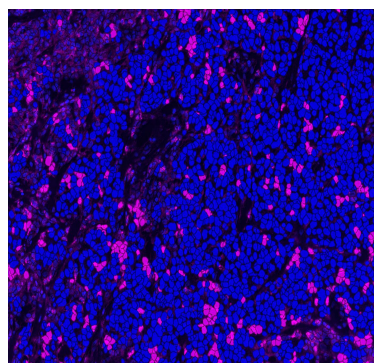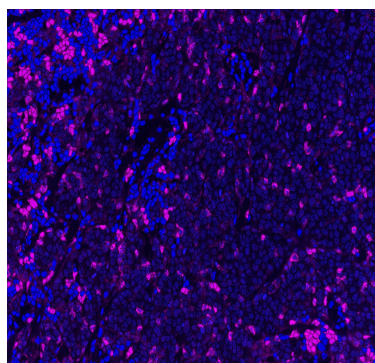

**Supplemental Figure S5:** Representation of Scoring. Scoring is done for all concatenated variables including: CD8, Ki67 and HLA-DR. Scoring is evaluated separately in tumor and stroma and a threshold is determined that finds all positive cells in image. As such, we show the representative score for CD8 in tumor and stroma separately. In the figure, the images are a representation of CD8 scoring only. Far Left: DAPI + CD8, Middle Left: Tissue Segmentation over DAPI + CD8 image. This provides the segmentation areas for the two images on the right. Middle Right: CD8 scoring in tumor area only. The stroma area is visible but not scored in this image. Cells highlighted in pink are positive while cells highlighted in blue are negative. Far Right: CD8 scoring in stroma area only. The tumor area is visible but not scored in this image. Cells highlighted in pink are positive while cells highlighted in blue are negative.

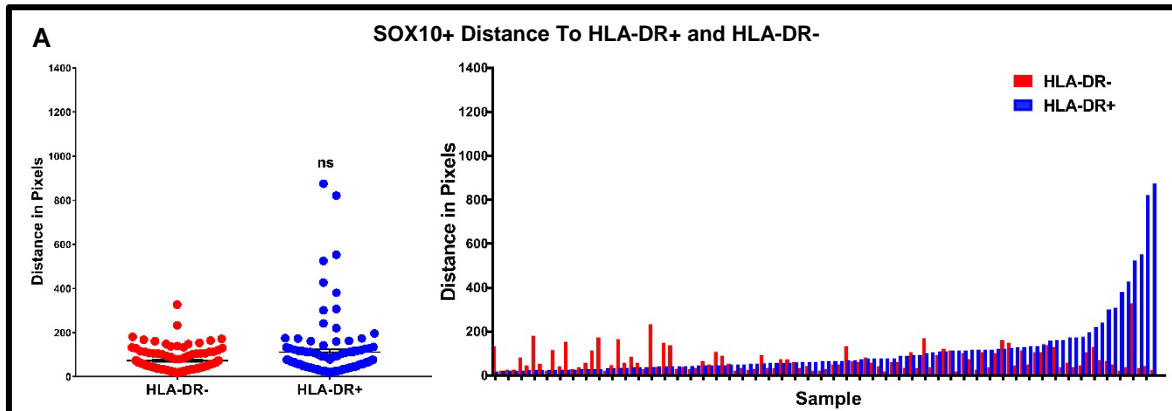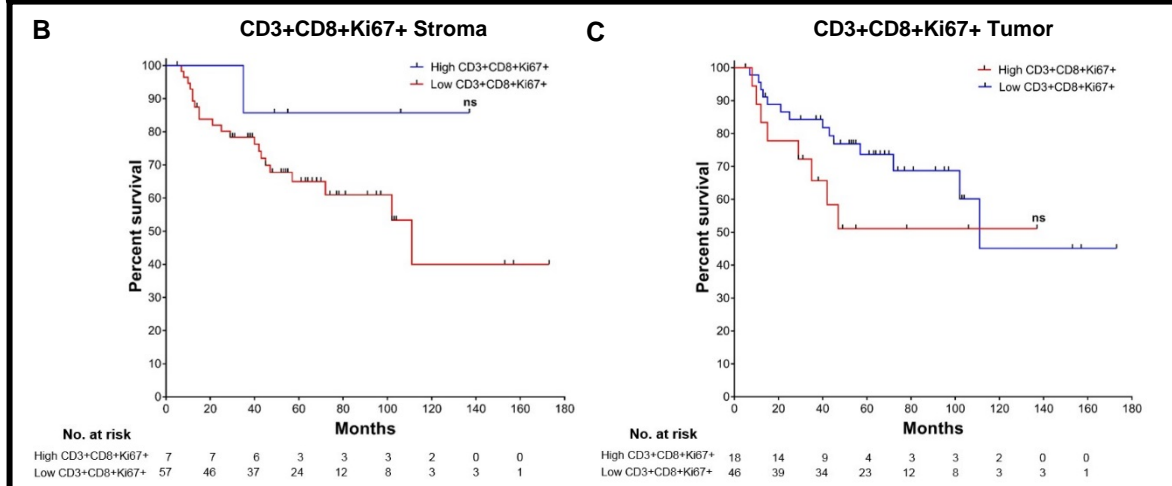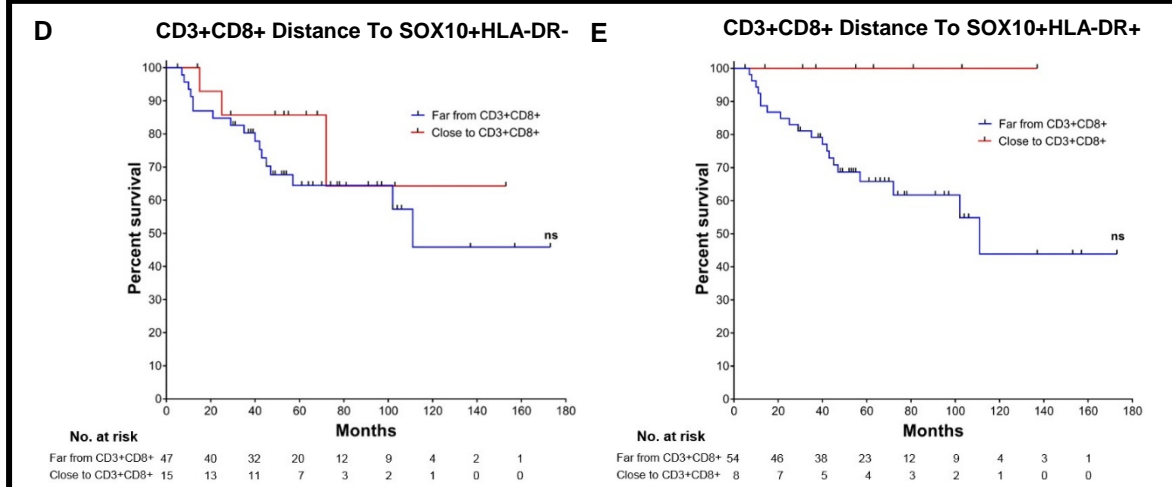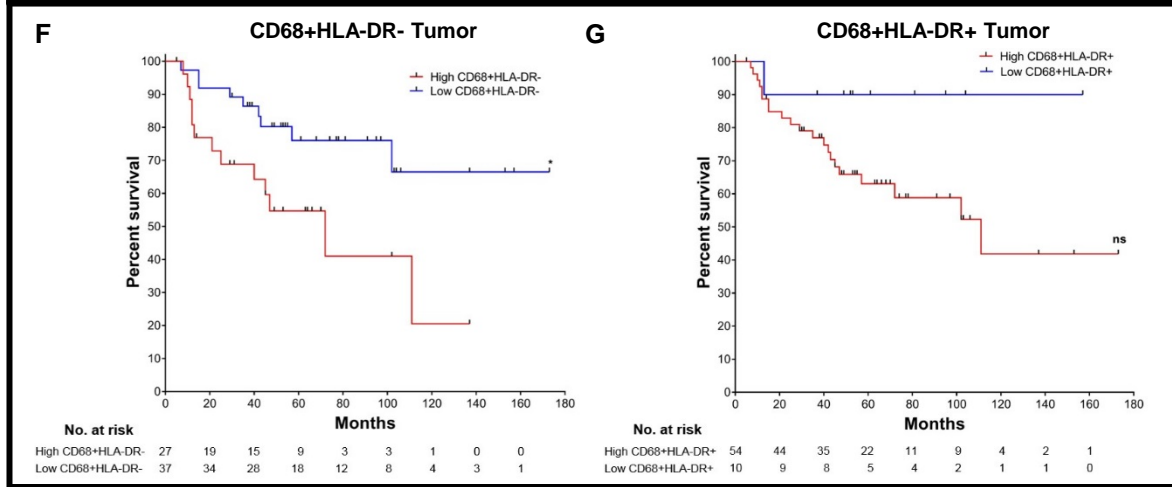

**Supplemental Figure S6: A)** Median distance of CTLs to SOX10+HLA-DR- (red) or SOX10+HLA-DR+ (blue) grouped (left,  $p=0.0846$ ), matched median distance to Ki67- and Ki67+ per patient (right). **B)** High ( $n=7$ ) and Low ( $n=57$ ) density of CD3+CD8+Ki67+ cells in stroma ( $p=0.1737$ ). **C)** High ( $n=18$ ) and Low ( $n=46$ ) density of CD3+CD8+Ki67+ cells in tumor ( $p=0.2161$ ). **D)** Far ( $n=47$ ) and Close ( $n=15$ ) distance of CTLs to HLA-DR- tumor ( $p=0.8436$ ). **E)** Far ( $n=54$ ) and Close ( $n=8$ ) distance of CTLs to HLA-DR+ tumor ( $p=0.0899$ ). **F)** High ( $n=27$ ) and Low ( $n=37$ ) density of CD68+HLA-DR- M $\phi$  in tumor ( $p=0.0163$ ). **G)** High ( $n=54$ ) and Low ( $n=10$ ) density of CD68+HLA-DR+ cells in tumor ( $p=0.1027$ ). Statistical comparison performed using Log-rank (Mantel-Cox) test. ns: not significant ( $P>0.05$ ), \* $P\leq 0.05$ .



| Receiver Operating Characteristic Curve    |                    |       |         |       |       |                |
|--------------------------------------------|--------------------|-------|---------|-------|-------|----------------|
| Variable                                   | Binary             | AUC   | Cutoff  | Sens  | Spec  | p              |
| CD3+CD8+ Stroma                            | Low vs High        | 0.668 | 0.042   | 0.545 | 0.762 | 0.021          |
| CD3+CD8+ Tumor                             | Low vs High        | 0.662 | 0.005   | 0.636 | 0.714 | 0.033          |
| CD3+CD8+ Total                             | Low vs High        | 0.640 | 0.038   | 0.636 | 0.548 | 0.076          |
| CD8 distance to CD68+HLA-DR-               | Close vs Far       | 0.682 | 165.540 | 0.550 | 0.805 | 0.011          |
| CD68+ Stroma                               | High vs Low        | 0.611 | 0.087   | 0.409 | 0.833 | 0.149          |
| CD68+ Tumor                                | High vs Low        | 0.616 | 0.003   | 0.909 | 0.333 | 0.094          |
| CD68+ Total                                | High vs Low        | 0.609 | 0.047   | 0.364 | 0.881 | 0.148          |
| CD8/CD68 Stroma Ratio                      | Low vs High        | 0.724 | 2.557   | 0.727 | 0.667 | 0.001          |
| CD8/CD68 Total Ratio                       | Low vs High        | 0.708 | 1.521   | 0.727 | 0.667 | 0.004          |
| Univariable Cox Proportional Hazards Model |                    |       |         |       |       |                |
| Variable                                   | Binary             | Value | x2      | p     | HR    | 95% CI         |
| CD3+CD8+ Stroma                            | Low vs High        | 0.964 | 5.018   | 0.025 | 2.621 | 1.128 - 6.091  |
| CD3+CD8+ Tumor                             | Low vs High        | 1.038 | 5.440   | 0.020 | 2.822 | 1.180 - 6.749  |
| CD3+CD8+ Total                             | Low vs High        | 0.596 | 1.803   | 0.179 | 1.816 | 0.760 - 4.336  |
| CD8 distance to CD68+HLA-DR-               | Close vs Far       | 1.139 | 6.386   | 0.012 | 3.122 | 1.291 - 7.551  |
| CD68+ Stroma                               | High vs Low        | 1.093 | 6.306   | 0.012 | 2.985 | 1.271 - 7.007  |
| CD68+ Tumor                                | High vs Low        | 1.000 | 2.580   | 0.108 | 2.718 | 0.802 - 9.209  |
| CD68+ Total                                | High vs Low        | 1.052 | 5.613   | 0.018 | 2.863 | 1.199 - 6.835  |
| CD8/CD68 Stroma Ratio                      | Low vs High        | 1.313 | 7.477   | 0.006 | 3.719 | 1.451 - 9.533  |
| CD8/CD68 Total Ratio                       | Low vs High        | 1.458 | 9.187   | 0.002 | 4.297 | 1.674 - 11.030 |
| TILs                                       | Non-Brisk vs Brisk | 1.225 | 3.840   | 0.050 | 3.405 | 1.000 - 11.597 |

**Supplemental Table S3:** ROC Curve and Univariable Cox results (n=64) for density of CTLs in stroma, tumor, and total, distance of CTLs to CD68+HLA-DR-macrophages, density of CD68+ macrophages in stroma, tumor, and total, and CD8/CD68 Ratio in Stroma and Total. (Abbreviations: Sens = Sensitivity, Spec = Specificity,  $\chi^2$  = Wald Chi-Square, HR = Hazard Ratio, CI = Confidence Interval).

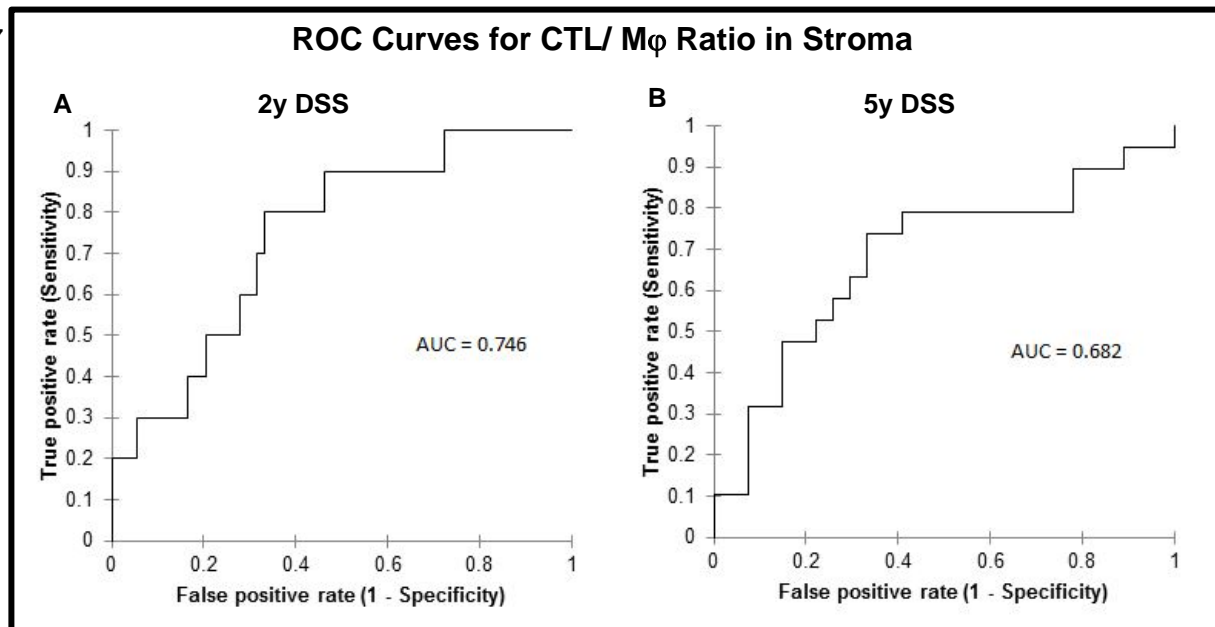

**Supplemental Figure S7: A)** ROC curve for 2y DSS (n=64, AUC = 0.746, p=0.001, cut off = 1.913, Sensitivity = 0.8, Specificity = 0.667) **B)** ROC curve for 5y DSS (n=46, AUC = 0.682, p=0.026, cut off = 2.557, Sensitivity = 0.737, Specificity = 0.667).

Supplemental Table S4

| Pearson Correlation Matrix     |                  |                |                |                 |             |             |              |
|--------------------------------|------------------|----------------|----------------|-----------------|-------------|-------------|--------------|
| Variables                      | CD8/ CD68 Stroma | CD3+CD8+ Total | CD3+CD8+ Tumor | CD3+CD8+ Stroma | CD68+ Total | CD68+ Tumor | CD68+ Stroma |
| CD8/ CD68 Stroma               | 1                | 0.472          | 0.535          | 0.549           | 0.443       | 0.328       | 0.596        |
| CD3+CD8+ Total                 | 0.472            | 1              | 0.586          | 0.680           | 0.007       | -0.100      | 0.181        |
| CD3+CD8+ Tumor                 | 0.535            | 0.586          | 1              | 0.607           | 0.136       | 0.022       | 0.110        |
| CD3+CD8+ Stroma                | 0.549            | 0.680          | 0.607          | 1               | 0.125       | 0.014       | 0.190        |
| CD68+ Total                    | 0.443            | 0.007          | 0.136          | 0.125           | 1           | 0.316       | 0.695        |
| CD68+ Tumor                    | 0.328            | -0.100         | 0.022          | 0.014           | 0.316       | 1           | 0.361        |
| CD68+ Stroma                   | 0.596            | 0.181          | 0.110          | 0.190           | 0.695       | 0.361       | 1            |
| p Values for Above Correlation |                  |                |                |                 |             |             |              |
| Variables                      | CD8/ CD68 Stroma | CD3+CD8+ Total | CD3+CD8+ Tumor | CD3+CD8+ Stroma | CD68+ Total | CD68+ Tumor | CD68+ Stroma |
| CD8/ CD68 Stroma               | 0                | 0.000          | 0.000          | 0.000           | 0.000       | 0.008       | 0.000        |
| CD3+CD8+ Total                 | < 0.0001         | 0              | < 0.0001       | < 0.0001        | 0.954       | 0.431       | 0.153        |
| CD3+CD8+ Tumor                 | < 0.0001         | < 0.0001       | 0              | < 0.0001        | 0.284       | 0.862       | 0.386        |
| CD3+CD8+ Stroma                | < 0.0001         | < 0.0001       | < 0.0001       | 0               | 0.324       | 0.914       | 0.133        |
| CD68+ Total                    | 0.000            | 0.954          | 0.284          | 0.324           | 0           | 0.011       | < 0.0001     |
| CD68+ Tumor                    | 0.008            | 0.431          | 0.862          | 0.914           | 0.011       | 0           | 0.003        |
| CD68+ Stroma                   | < 0.0001         | 0.153          | 0.386          | 0.133           | < 0.0001    | 0.003       | 0            |

**Supplemental Table S4:** Pearson Correlation Matrix showing correlation of CD8/CD68 (CTL/M $\phi$ ) ratio in stroma, with variables of CD8 (Total, Tumor and Stroma) and CD68 (Total, Tumor and Stroma) for all 64 patients with DSS. Values in bold are significant at  $p \leq 0.05$ .
